# Supplementary material
Source: HighWire-hosted journal article supplement (https://ard.bmj.com/content/78/10/1398)

**Supplementary Figure S1.** Correlations between biological data, age at sampling and body mass index in all patients. The size and color intensity of the circles are proportional to the correlation coefficient, calculated with the nonparametric Spearman correlation test. Only statistically significant correlations ( $p < 0.05$  and  $q$ -value, i.e., the false discovery rate using the Benjamini-Hochberg correction was less than 0.25) are indicated. *TNF*: tumor necrosis factor; *SAA*: serum amyloid A; *CRP*: C-reactive protein; *BMI*: body mass index; *IDO*: indoleamine 2,3-dioxygenase; *S100*: S100 A8/A9; *IL*: interleukin.

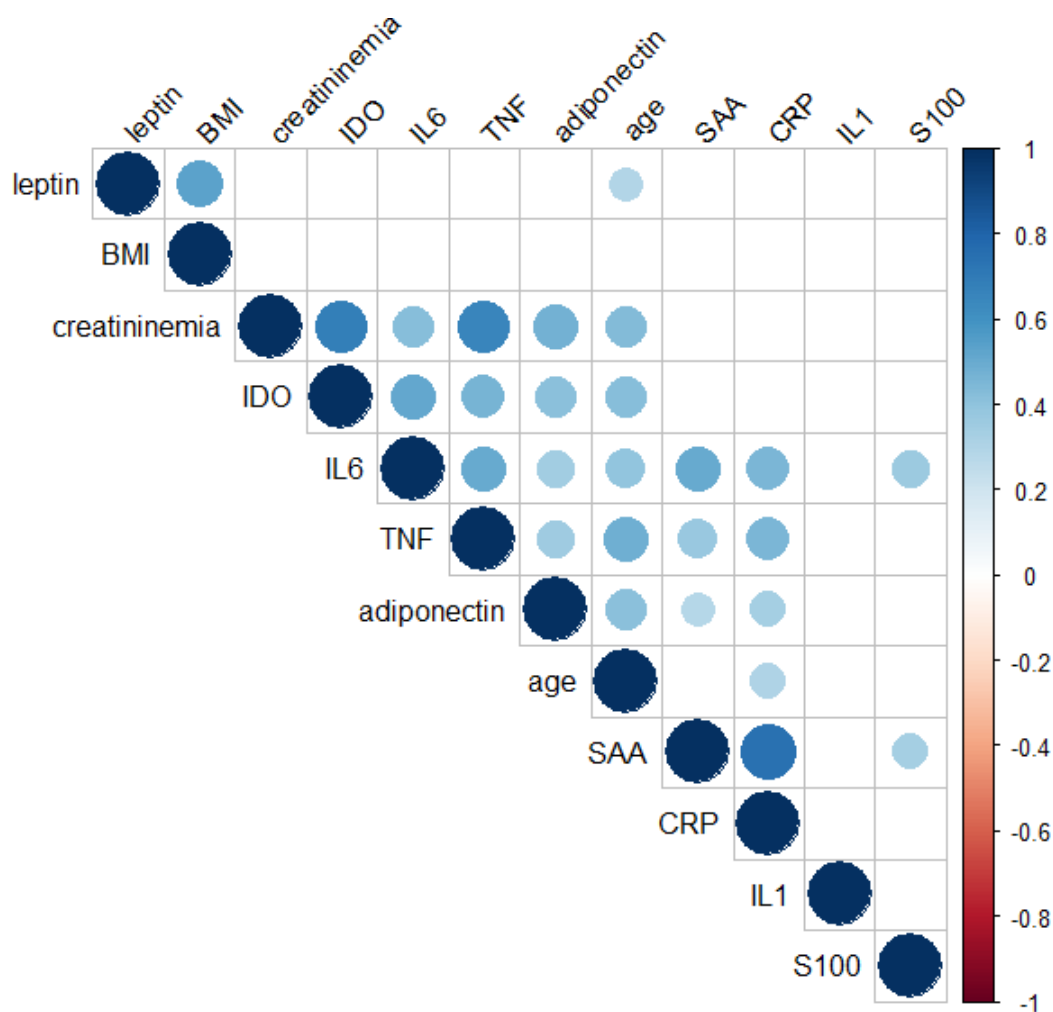

Supplement: inline-supplementary-material-1 [file inline-supplementary-material-1.pdf]
