# Supplementary material
Source: HighWire-hosted journal article supplement (https://ard.bmj.com/content/78/10/1398)
Supplement: inline-supplementary-material-4 [file inline-supplementary-material-4.pdf]

**Supplementary Table 2.** Characteristics of AA amyloidosis patients.

| Patient | Sex    | Age at stool sampling | Cause of AA amyloidosis                                        | Tissues biopsied for AA amyloidosis diagnosis | Current treatment                                               |
|---------|--------|-----------------------|----------------------------------------------------------------|-----------------------------------------------|-----------------------------------------------------------------|
| 1       | Male   | 73                    | Familial Mediterranean fever M694V/M694V                       | Minor salivary glands                         | Colchicine + anti-interleukin-1                                 |
| 2       | Female | 56                    | Familial Mediterranean fever M694V/M694V                       | Minor salivary glands                         | Anti-interleukin-1                                              |
| 3       | Female | 65                    | Familial Mediterranean fever M694V/M694V                       | Kidney                                        | Colchicine                                                      |
| 4       | Female | 45                    | Familial Mediterranean fever M694I/M694I                       | Kidney                                        | Colchicine                                                      |
| 5       | Male   | 42                    | Familial Mediterranean fever M694V/M694V                       | Kidney                                        | Anti-interleukin-1                                              |
| 6       | Female | 47                    | Familial Mediterranean fever M694V/M694V                       | Kidney                                        | Colchicine                                                      |
| 7       | Male   | 54                    | Familial Mediterranean fever M694V/M694V                       | Minor salivary glands and duodenum            | Colchicine + anti-interleukin-1                                 |
| 8       | Male   | 40                    | Pyrim-Associated Autoinflammation with Neutrophilic Dermatitis | Colon                                         | Anti-tumor necrosis factor- $\alpha$                            |
| 9       | Female | 69                    | Rheumatoid arthritis                                           | Kidney                                        | None                                                            |
| 10      | Female | 54                    | Fabry disease                                                  | Kidney                                        | Colchicine + anti-interleukin-1 + enzyme replacement therapy    |
| 11      | Female | 68                    | Obesity                                                        | Kidney                                        | None                                                            |
| 12      | Female | 64                    | Psoriatic rheumatism                                           | Kidney                                        | Anti-tumor necrosis factor- $\alpha$ + steroids + sulfasalazine |
| 13      | Male   | 50                    | Unknown                                                        | Minor salivary glands and colon               | Colchicine                                                      |
| 14      | Female | 66                    | Obesity                                                        | Kidney                                        | None                                                            |
| 15      | Male   | 47                    | Crohn's disease                                                | Kidney                                        | None                                                            |
| 16      | Female | 67                    | Rhupus syndrome                                                | Kidney, minor salivary glands,                | Anti-interleukin-6                                              |

|    |        |    |                                                                          |                                                              |                            |
|----|--------|----|--------------------------------------------------------------------------|--------------------------------------------------------------|----------------------------|
| 17 | Male   | 47 | Unknown                                                                  | digestive tract,<br>skin and bladder<br>Kidney and<br>spleen | Anti-interleukin-6         |
| 18 | Male   | 74 | Waldenstrom's<br>macroglobulinemia<br>with <i>MyD88</i><br>mutation      | Kidney, minor<br>salivary glands<br>and rectum               | Anti-interleukin-1         |
| 19 | Male   | 67 | Unknown                                                                  | Kidney                                                       | None                       |
| 20 | Female | 60 | Human<br>immunodeficiency<br>virus infection                             | Kidney and liver                                             | Anti-retroviral<br>therapy |
| 21 | Male   | 74 | Schnitzler<br>syndrome                                                   | Kidney                                                       | Anti-interleukin-1         |
| 22 | Male   | 33 | Other genetic<br>etiology                                                | Minor salivary<br>glands and skin                            | None                       |
| 23 | Male   | 77 | Unknown                                                                  | Minor salivary<br>glands                                     | None                       |
| 24 | Female | 76 | Obesity                                                                  | Kidney                                                       | None                       |
| 25 | Male   | 40 | Synovitis, Acne,<br>Pustulosis,<br>Hyperostosis and<br>Osteitis syndrome | Kidney                                                       | Anti-interleukin-6         |
| 26 | Male   | 43 | Tumor necrosis<br>Receptor<br>Associated Periodic<br>Syndrome            | Digestive tract                                              | Anti-interleukin-6         |
